# Supplementary material for: Fire weather effects on flammability of indigenous and invasive alien plants in coastal fynbos and thicket shrublands (Cape Floristic Region)
Source: PeerJ journal article supplement (doi:10.7717/peerj.10161), 2020-11-11

## Supplemental Figure S1

Collage of photos showing the different vegetation types, i.e. Fynbos, Thicket, and Invasive Alien Plants (IAP), along the southern Cape coast of South Africa. Photo credits: Tineke Kraaij, except fourth image from the top credited to Tiaan Strydom.

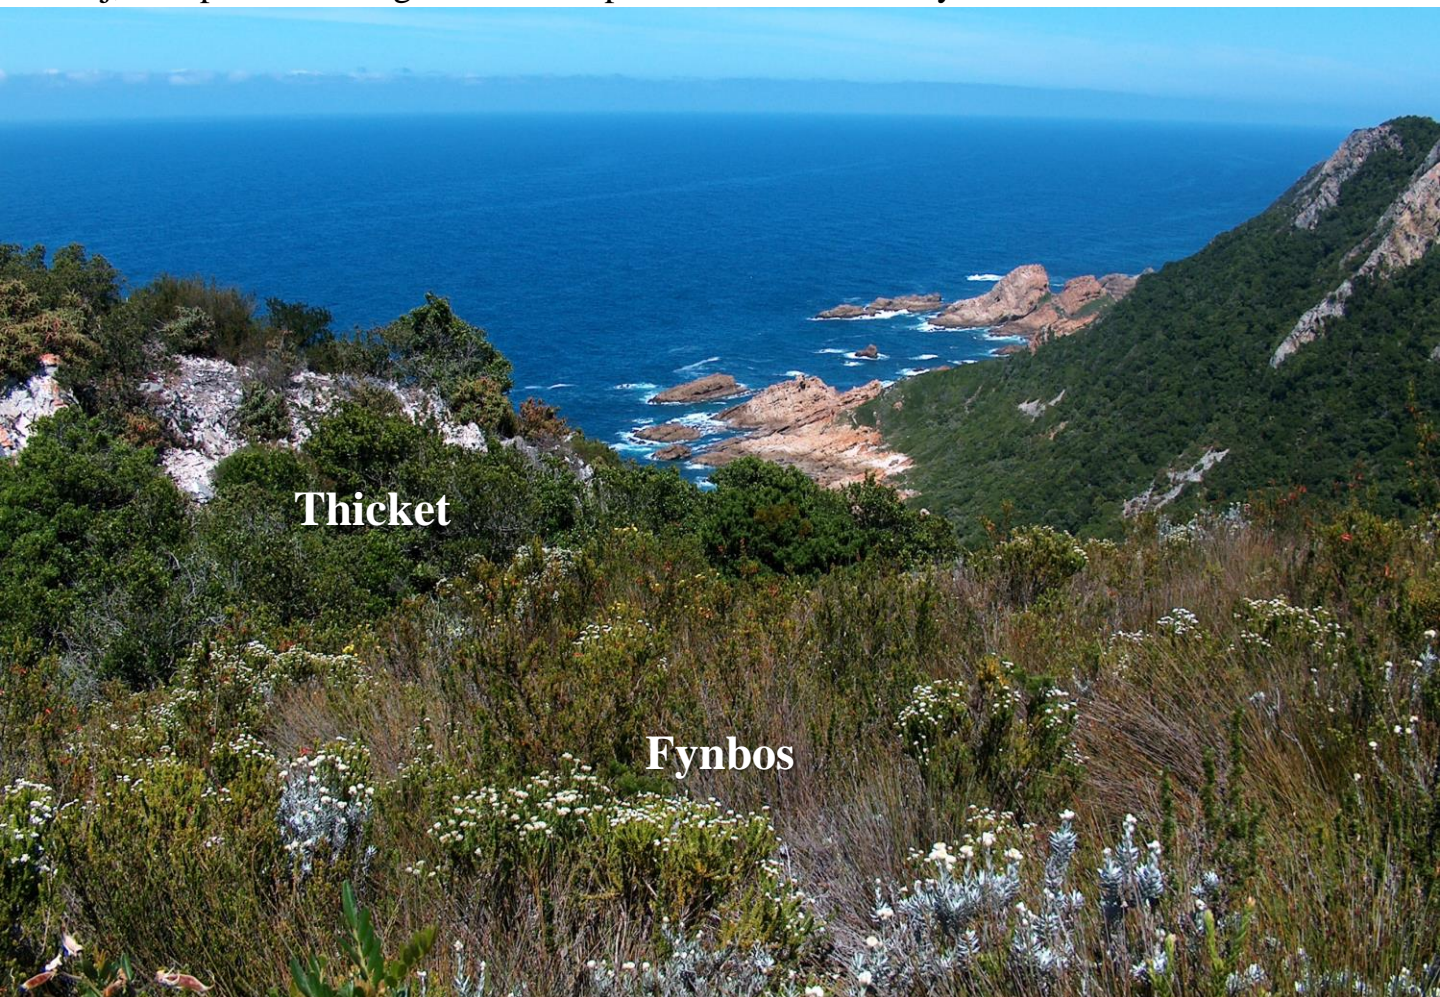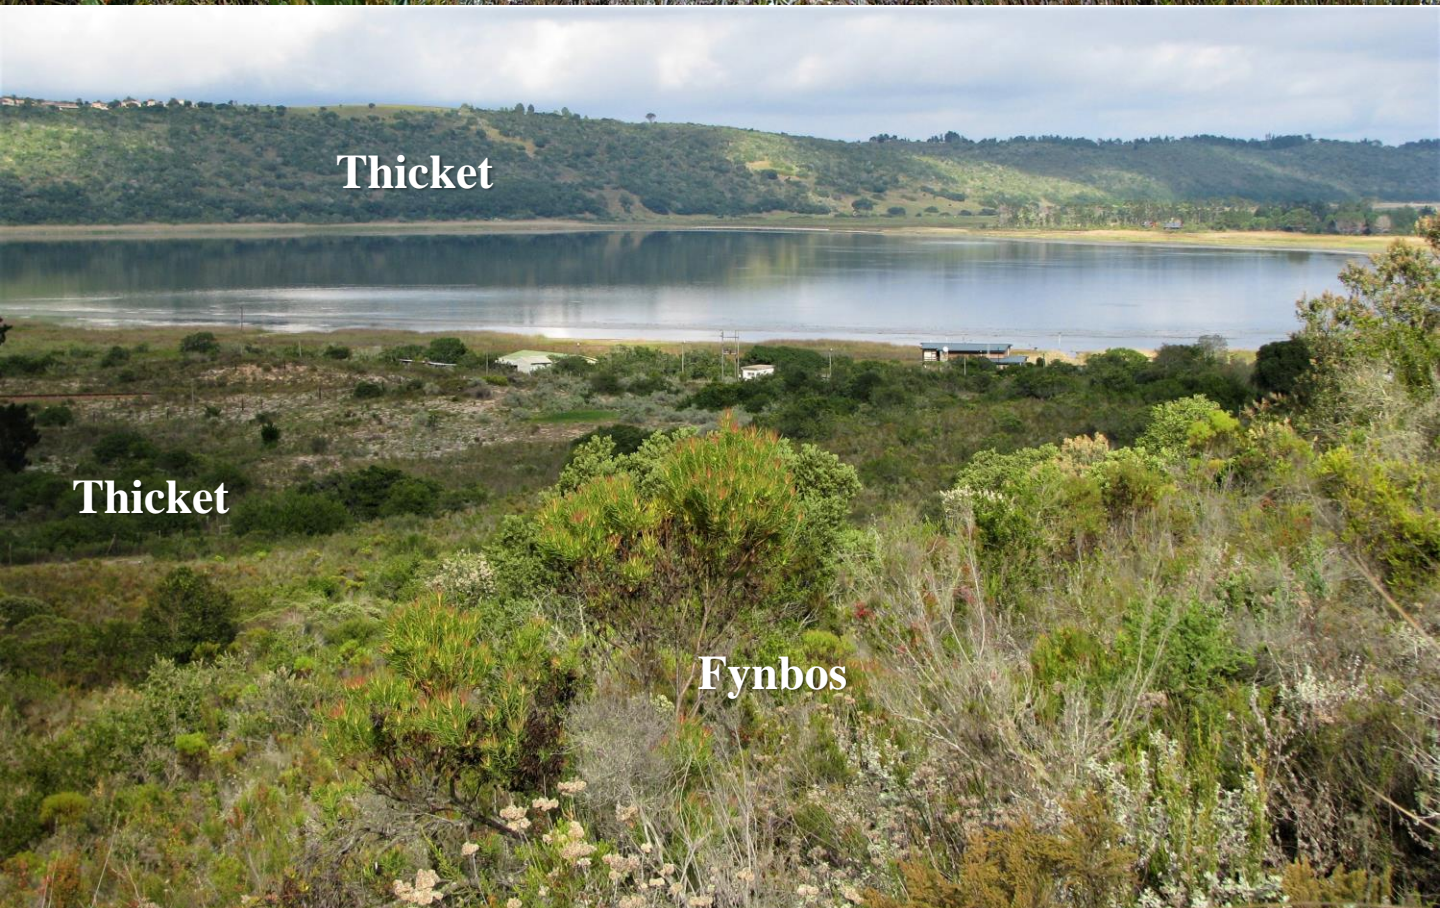

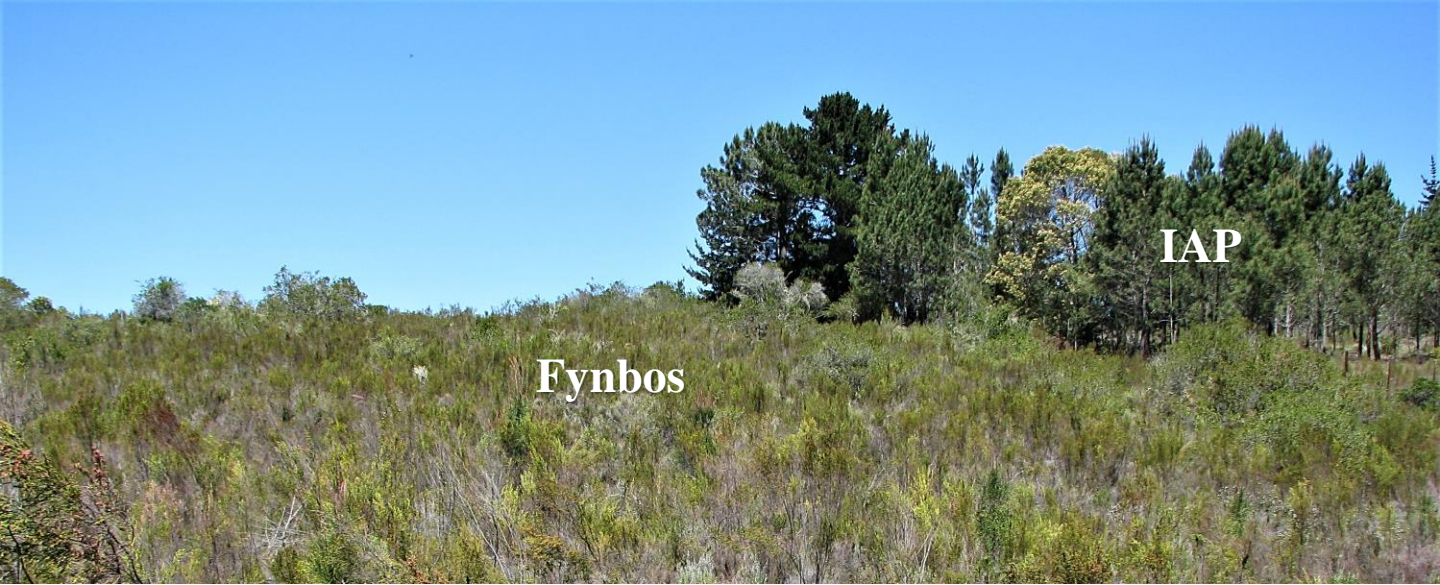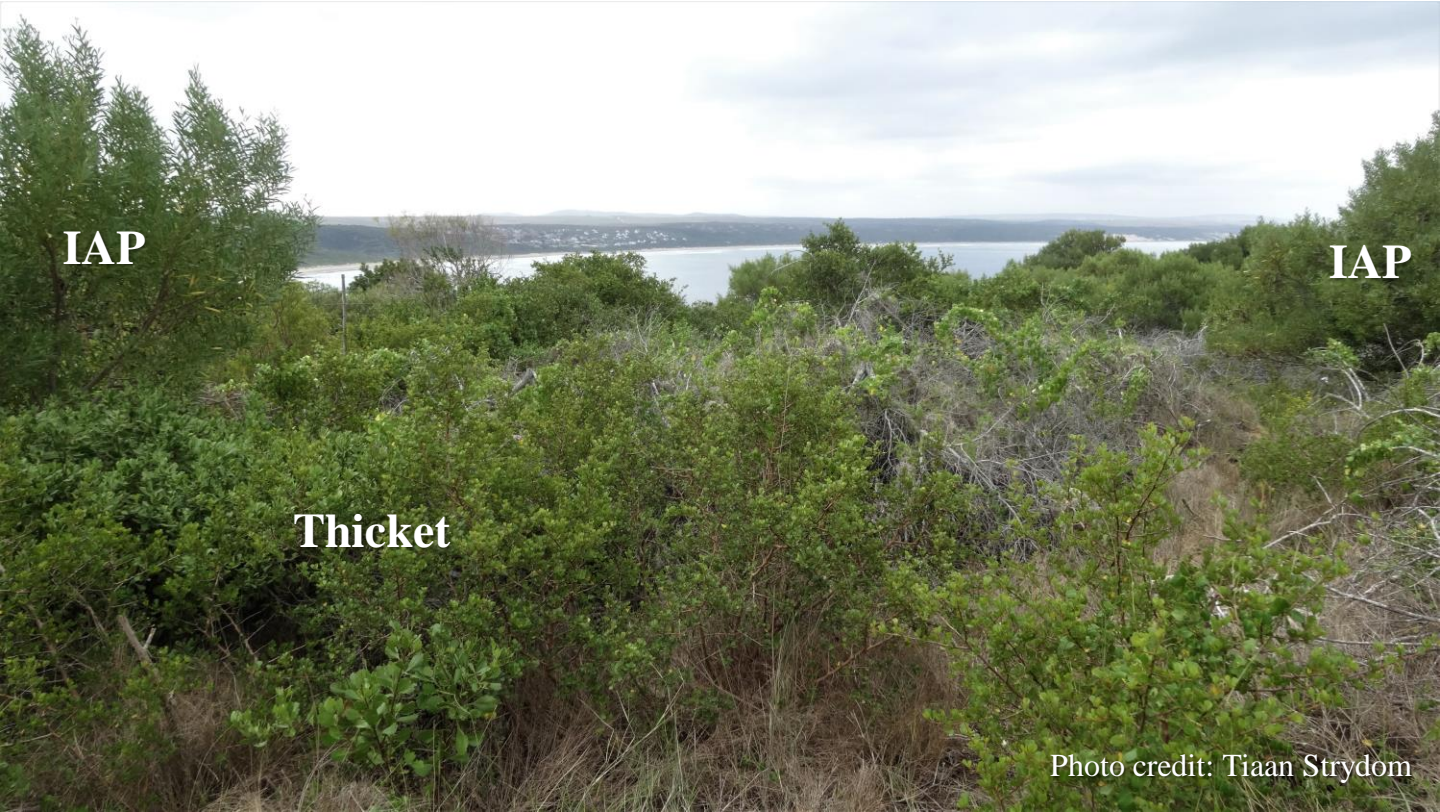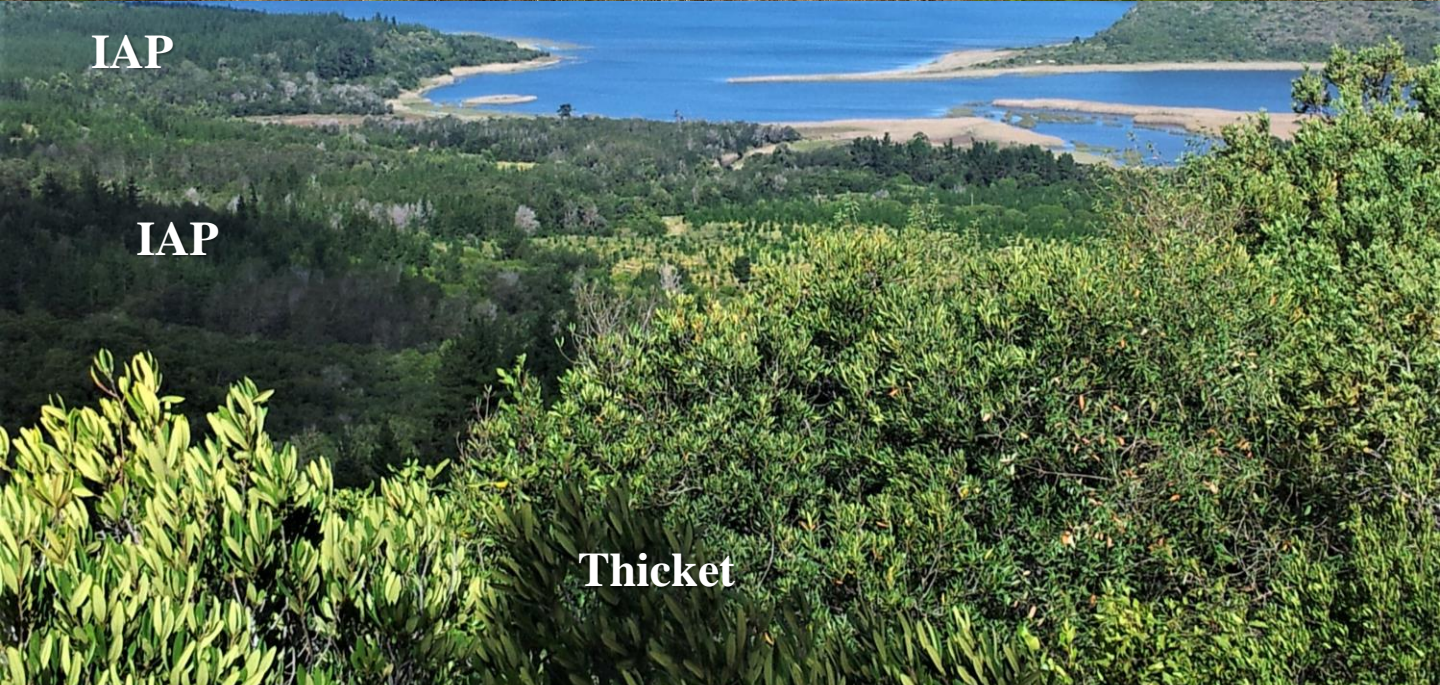

Supplement: Supplemental_Figure_S1.pdf [file Supplemental_Figure_S1.pdf]
